# Supplementary material for: knnAUC: an open-source R package for detecting nonlinear dependence between one continuous variable and one binary variable
Source: BMC Bioinformatics. 2018 Nov 22;19:448. doi: 10.1186/s12859-018-2427-4 (PMC6249767; doi:10.1186/s12859-018-2427-4)
Supplement: Supplementary file 5 — The simulation power of knnAUC with different ratios in nine simple functions. (XLSX 22 kb) [file 12859_2018_2427_MOESM5_ESM.xlsx]

## Sheet: Sheet1
Simulation power of knnAUC with different ratios in nine simple functions
		maxk=100	maxk=100	maxk=100	maxk=100	maxk=100	maxk=100	maxk=100	maxk=100	maxk=100	maxk=100	maxk=100	maxk=100	maxk=100	maxk=100	maxk=100	maxk=100	maxk=100	maxk=100	maxk=100	maxk=100	maxk=100	maxk=100	maxk=100	maxk=100	maxk=100	maxk=100	maxk=100	maxk=100	maxk=100	maxk=100	maxk=100	maxk=100	maxk=100	maxk=100	maxk=100	maxk=100	maxk=100	maxk=100	maxk=100	maxk=100	maxk=100
N=100, X~N(0,SD^2), SD=1	average proportion of Y=1 of 1000 simulations	ratio=0.1	ratio=0.12	ratio=0.14	ratio=0.16	ratio=0.18	ratio=0.2	ratio=0.22	ratio=0.24	ratio=0.26	ratio=0.28	ratio=0.3	ratio=0.32	ratio=0.34	ratio=0.36	ratio=0.38	ratio=0.4	ratio=0.42	ratio=0.44	ratio=0.46	ratio=0.48	ratio=0.5	ratio=0.52	ratio=0.54	ratio=0.56	ratio=0.58	ratio=0.6	ratio=0.62	ratio=0.64	ratio=0.66	ratio=0.68	ratio=0.7	ratio=0.72	ratio=0.74	ratio=0.76	ratio=0.78	ratio=0.8	ratio=0.82	ratio=0.84	ratio=0.86	ratio=0.88	ratio=0.9
logit(P(Y=1|X)) = X+1	0.69571	0.602	0.63	0.635	0.643	0.662	0.68	0.662	0.683	0.681	0.691	0.661	0.68	0.693	0.668	0.666	0.679	0.656	0.658	0.648	0.631	0.635	0.596	0.627	0.618	0.592	0.573	0.552	0.541	0.528	0.519	0.494	0.484	0.438	0.416	0.369	0.381	0.336	0.3	0.285	0.205	0.206
logit(P(Y=1|X)) = (0.25*X+1)^2+1	0.87877	0.172	0.133	0.125	0.138	0.113	0.11	0.125	0.124	0.12	0.117	0.116	0.136	0.116	0.122	0.107	0.09	0.107	0.115	0.118	0.109	0.102	0.11	0.093	0.109	0.1	0.097	0.104	0.087	0.1	0.088	0.094	0.093	0.085	0.097	0.082	0.085	0.072	0.066	0.066	0.049	0.056
logit(P(Y=1|X)) = sin(pi*X+1)+1	0.7117	0.194	0.241	0.225	0.24	0.251	0.262	0.26	0.26	0.276	0.289	0.286	0.285	0.29	0.295	0.289	0.311	0.295	0.28	0.306	0.274	0.289	0.271	0.236	0.266	0.252	0.258	0.235	0.239	0.226	0.225	0.219	0.22	0.196	0.181	0.171	0.176	0.172	0.159	0.128	0.119	0.099
logit(P(Y=1|X)) = sin(2*pi*X+1)+1	0.70814	0.092	0.093	0.111	0.102	0.121	0.147	0.147	0.135	0.16	0.145	0.148	0.158	0.171	0.17	0.162	0.177	0.174	0.179	0.192	0.169	0.174	0.187	0.17	0.171	0.179	0.173	0.148	0.159	0.158	0.157	0.166	0.161	0.148	0.142	0.144	0.119	0.104	0.107	0.109	0.08	0.072
logit(P(Y=1|X)) = sin(3*pi*X+1)+1	0.70906	0.068	0.064	0.078	0.073	0.084	0.076	0.088	0.094	0.094	0.088	0.1	0.092	0.088	0.109	0.104	0.103	0.102	0.116	0.12	0.116	0.113	0.113	0.106	0.127	0.136	0.132	0.123	0.131	0.103	0.108	0.105	0.117	0.108	0.106	0.107	0.098	0.098	0.081	0.075	0.072	0.072
logit(P(Y=1|X)) = cos(pi*X+1)+1	0.71069	0.21	0.212	0.244	0.249	0.246	0.279	0.283	0.274	0.292	0.269	0.293	0.271	0.307	0.315	0.285	0.291	0.297	0.317	0.291	0.277	0.269	0.262	0.29	0.27	0.269	0.269	0.266	0.261	0.25	0.217	0.217	0.223	0.22	0.196	0.184	0.161	0.158	0.142	0.119	0.121	0.096
logit(P(Y=1|X)) = cos(2*pi*X+1)+1	0.71036	0.097	0.097	0.111	0.116	0.126	0.123	0.13	0.146	0.145	0.143	0.151	0.171	0.169	0.15	0.157	0.168	0.163	0.163	0.179	0.176	0.17	0.176	0.168	0.174	0.173	0.177	0.184	0.162	0.158	0.179	0.165	0.16	0.149	0.125	0.14	0.135	0.109	0.117	0.098	0.082	0.078
logit(P(Y=1|X)) = cos(3*pi*X+1)+1	0.7098	0.06	0.061	0.071	0.077	0.072	0.07	0.085	0.089	0.085	0.093	0.099	0.095	0.098	0.118	0.1	0.12	0.099	0.109	0.111	0.102	0.108	0.101	0.108	0.094	0.106	0.111	0.115	0.129	0.1	0.093	0.114	0.109	0.116	0.098	0.093	0.091	0.095	0.095	0.069	0.073	0.056
Simulation power of knnAUC with different ratios in nine simple functions
		maxk=100	maxk=100	maxk=100	maxk=100	maxk=100	maxk=100	maxk=100	maxk=100	maxk=100	maxk=100	maxk=100	maxk=100	maxk=100	maxk=100	maxk=100	maxk=100	maxk=100	maxk=100	maxk=100	maxk=100	maxk=100	maxk=100	maxk=100	maxk=100	maxk=100	maxk=100	maxk=100	maxk=100	maxk=100	maxk=100	maxk=100	maxk=100	maxk=100	maxk=100	maxk=100	maxk=100	maxk=100	maxk=100	maxk=100	maxk=100	maxk=100
N=100, X~N(0,SD^2), SD=2	average proportion of Y=1 of 1000 simulations	ratio=0.1	ratio=0.12	ratio=0.14	ratio=0.16	ratio=0.18	ratio=0.2	ratio=0.22	ratio=0.24	ratio=0.26	ratio=0.28	ratio=0.3	ratio=0.32	ratio=0.34	ratio=0.36	ratio=0.38	ratio=0.4	ratio=0.42	ratio=0.44	ratio=0.46	ratio=0.48	ratio=0.5	ratio=0.52	ratio=0.54	ratio=0.56	ratio=0.58	ratio=0.6	ratio=0.62	ratio=0.64	ratio=0.66	ratio=0.68	ratio=0.7	ratio=0.72	ratio=0.74	ratio=0.76	ratio=0.78	ratio=0.8	ratio=0.82	ratio=0.84	ratio=0.86	ratio=0.88	ratio=0.9
logit(P(Y=1|X)) = X+1	0.64759	0.906	0.916	0.926	0.948	0.959	0.966	0.969	0.966	0.976	0.972	0.972	0.972	0.983	0.98	0.972	0.977	0.983	0.976	0.984	0.984	0.977	0.978	0.97	0.98	0.968	0.963	0.954	0.964	0.946	0.932	0.941	0.921	0.896	0.874	0.856	0.825	0.793	0.742	0.68	0.576	0.474
logit(P(Y=1|X)) = (0.25*X+1)^2+1	0.87431	0.295	0.281	0.294	0.276	0.265	0.28	0.275	0.248	0.262	0.275	0.26	0.254	0.265	0.265	0.244	0.241	0.229	0.225	0.23	0.225	0.242	0.219	0.205	0.207	0.188	0.197	0.189	0.187	0.19	0.171	0.19	0.158	0.167	0.162	0.144	0.153	0.109	0.117	0.107	0.094	0.065
logit(P(Y=1|X)) = sin(pi*X+1)+1	0.70814	0.092	0.093	0.111	0.102	0.121	0.147	0.147	0.135	0.16	0.145	0.148	0.158	0.171	0.17	0.162	0.177	0.174	0.179	0.192	0.169	0.174	0.187	0.17	0.171	0.179	0.173	0.148	0.159	0.158	0.157	0.166	0.161	0.148	0.142	0.144	0.119	0.104	0.107	0.109	0.08	0.072
logit(P(Y=1|X)) = sin(2*pi*X+1)+1	0.71005	0.06	0.066	0.053	0.063	0.074	0.07	0.074	0.076	0.077	0.057	0.08	0.073	0.092	0.081	0.085	0.088	0.077	0.094	0.079	0.076	0.091	0.079	0.088	0.086	0.076	0.079	0.075	0.087	0.108	0.088	0.087	0.094	0.075	0.085	0.083	0.076	0.075	0.084	0.065	0.07	0.05
logit(P(Y=1|X)) = sin(3*pi*X+1)+1	0.70952	0.048	0.044	0.053	0.057	0.057	0.039	0.054	0.054	0.056	0.052	0.054	0.064	0.055	0.059	0.052	0.043	0.061	0.056	0.063	0.069	0.053	0.055	0.053	0.054	0.051	0.05	0.064	0.065	0.051	0.057	0.062	0.06	0.061	0.053	0.055	0.046	0.047	0.055	0.044	0.042	0.04
logit(P(Y=1|X)) = cos(pi*X+1)+1	0.71036	0.097	0.097	0.111	0.116	0.126	0.123	0.13	0.146	0.145	0.143	0.151	0.171	0.169	0.15	0.157	0.168	0.163	0.163	0.179	0.176	0.17	0.176	0.168	0.174	0.173	0.177	0.184	0.162	0.158	0.179	0.165	0.16	0.149	0.125	0.14	0.135	0.109	0.117	0.098	0.082	0.078
logit(P(Y=1|X)) = cos(2*pi*X+1)+1	0.70995	0.067	0.072	0.065	0.064	0.068	0.066	0.077	0.075	0.069	0.07	0.071	0.073	0.072	0.085	0.08	0.076	0.077	0.083	0.081	0.101	0.087	0.096	0.085	0.096	0.108	0.103	0.088	0.093	0.076	0.094	0.085	0.076	0.08	0.084	0.082	0.084	0.073	0.069	0.066	0.064	0.065
logit(P(Y=1|X)) = cos(3*pi*X+1)+1	0.70902	0.048	0.058	0.062	0.051	0.057	0.048	0.064	0.053	0.056	0.05	0.052	0.064	0.059	0.058	0.071	0.058	0.045	0.054	0.062	0.063	0.058	0.054	0.063	0.079	0.072	0.057	0.064	0.065	0.047	0.062	0.029	0.066	0.056	0.06	0.062	0.055	0.053	0.05	0.054	0.041	0.048
Simulation power of knnAUC with different ratios in nine simple functions
		maxk=100	maxk=100	maxk=100	maxk=100	maxk=100	maxk=100	maxk=100	maxk=100	maxk=100	maxk=100	maxk=100	maxk=100	maxk=100	maxk=100	maxk=100	maxk=100	maxk=100	maxk=100	maxk=100	maxk=100	maxk=100	maxk=100	maxk=100	maxk=100	maxk=100	maxk=100	maxk=100	maxk=100	maxk=100	maxk=100	maxk=100	maxk=100	maxk=100	maxk=100	maxk=100	maxk=100	maxk=100	maxk=100	maxk=100	maxk=100	maxk=100
N=100, X~N(0,SD^2), SD=3	average proportion of Y=1 of 1000 simulations	ratio=0.1	ratio=0.12	ratio=0.14	ratio=0.16	ratio=0.18	ratio=0.2	ratio=0.22	ratio=0.24	ratio=0.26	ratio=0.28	ratio=0.3	ratio=0.32	ratio=0.34	ratio=0.36	ratio=0.38	ratio=0.4	ratio=0.42	ratio=0.44	ratio=0.46	ratio=0.48	ratio=0.5	ratio=0.52	ratio=0.54	ratio=0.56	ratio=0.58	ratio=0.6	ratio=0.62	ratio=0.64	ratio=0.66	ratio=0.68	ratio=0.7	ratio=0.72	ratio=0.74	ratio=0.76	ratio=0.78	ratio=0.8	ratio=0.82	ratio=0.84	ratio=0.86	ratio=0.88	ratio=0.9
logit(P(Y=1|X)) = X+1	0.61328	0.963	0.971	0.983	0.989	0.989	0.995	0.995	0.994	0.997	0.995	0.998	0.995	0.999	0.999	0.999	1	0.999	1	0.998	0.999	0.999	0.999	0.997	0.997	0.997	0.995	0.997	0.992	0.998	0.992	0.99	0.99	0.982	0.982	0.97	0.954	0.925	0.888	0.865	0.792	0.686
logit(P(Y=1|X)) = (0.25*X+1)^2+1	0.87388	0.425	0.414	0.412	0.391	0.381	0.382	0.372	0.377	0.346	0.366	0.366	0.371	0.354	0.374	0.336	0.322	0.326	0.341	0.322	0.318	0.306	0.319	0.29	0.291	0.274	0.279	0.251	0.263	0.247	0.22	0.254	0.212	0.225	0.194	0.196	0.174	0.142	0.127	0.142	0.118	0.081
logit(P(Y=1|X)) = sin(pi*X+1)+1	0.70906	0.068	0.064	0.078	0.073	0.084	0.076	0.088	0.094	0.094	0.088	0.1	0.092	0.088	0.109	0.104	0.103	0.102	0.116	0.12	0.116	0.113	0.113	0.106	0.127	0.136	0.132	0.123	0.131	0.103	0.108	0.105	0.117	0.108	0.106	0.107	0.098	0.098	0.081	0.075	0.072	0.072
logit(P(Y=1|X)) = sin(2*pi*X+1)+1	0.70952	0.048	0.044	0.053	0.057	0.057	0.039	0.054	0.054	0.056	0.052	0.054	0.064	0.055	0.059	0.052	0.043	0.061	0.056	0.063	0.069	0.053	0.055	0.053	0.054	0.051	0.05	0.064	0.065	0.051	0.057	0.062	0.06	0.061	0.053	0.055	0.046	0.047	0.055	0.044	0.042	0.04
logit(P(Y=1|X)) = sin(3*pi*X+1)+1	0.70985	0.032	0.054	0.058	0.04	0.048	0.043	0.051	0.051	0.055	0.05	0.041	0.046	0.054	0.053	0.051	0.047	0.037	0.043	0.056	0.054	0.043	0.052	0.048	0.049	0.041	0.057	0.046	0.057	0.041	0.058	0.038	0.044	0.054	0.058	0.047	0.048	0.035	0.05	0.05	0.037	0.032
logit(P(Y=1|X)) = cos(pi*X+1)+1	0.7098	0.06	0.061	0.071	0.077	0.072	0.07	0.085	0.089	0.085	0.093	0.099	0.095	0.098	0.118	0.1	0.12	0.099	0.109	0.111	0.102	0.108	0.101	0.108	0.094	0.106	0.111	0.115	0.129	0.1	0.093	0.114	0.109	0.116	0.098	0.093	0.091	0.095	0.095	0.069	0.073	0.056
logit(P(Y=1|X)) = cos(2*pi*X+1)+1	0.70902	0.048	0.058	0.062	0.051	0.057	0.048	0.064	0.053	0.056	0.05	0.052	0.064	0.059	0.058	0.071	0.058	0.045	0.054	0.062	0.063	0.058	0.054	0.063	0.079	0.072	0.057	0.064	0.065	0.047	0.062	0.029	0.066	0.056	0.06	0.062	0.055	0.053	0.05	0.054	0.041	0.048
logit(P(Y=1|X)) = cos(3*pi*X+1)+1	0.70909	0.048	0.042	0.052	0.051	0.052	0.062	0.057	0.051	0.034	0.06	0.055	0.047	0.055	0.055	0.053	0.041	0.056	0.056	0.055	0.046	0.048	0.054	0.056	0.043	0.057	0.065	0.053	0.046	0.042	0.059	0.051	0.045	0.046	0.045	0.049	0.044	0.047	0.047	0.037	0.047	0.028
Simulation power of knnAUC with different ratios in nine simple functions
		maxk=100	maxk=100	maxk=100	maxk=100	maxk=100	maxk=100	maxk=100	maxk=100	maxk=100	maxk=100	maxk=100	maxk=100	maxk=100	maxk=100	maxk=100	maxk=100	maxk=100	maxk=100	maxk=100	maxk=100	maxk=100	maxk=100	maxk=100	maxk=100	maxk=100	maxk=100	maxk=100	maxk=100	maxk=100	maxk=100	maxk=100	maxk=100	maxk=100	maxk=100	maxk=100	maxk=100	maxk=100	maxk=100	maxk=100	maxk=100	maxk=100
N=100, X~N(0,SD^2), SD=1/2	average proportion of Y=1 of 1000 simulations	ratio=0.1	ratio=0.12	ratio=0.14	ratio=0.16	ratio=0.18	ratio=0.2	ratio=0.22	ratio=0.24	ratio=0.26	ratio=0.28	ratio=0.3	ratio=0.32	ratio=0.34	ratio=0.36	ratio=0.38	ratio=0.4	ratio=0.42	ratio=0.44	ratio=0.46	ratio=0.48	ratio=0.5	ratio=0.52	ratio=0.54	ratio=0.56	ratio=0.58	ratio=0.6	ratio=0.62	ratio=0.64	ratio=0.66	ratio=0.68	ratio=0.7	ratio=0.72	ratio=0.74	ratio=0.76	ratio=0.78	ratio=0.8	ratio=0.82	ratio=0.84	ratio=0.86	ratio=0.88	ratio=0.9
logit(P(Y=1|X)) = X+1	0.71916	0.235	0.251	0.243	0.243	0.202	0.231	0.219	0.23	0.231	0.218	0.207	0.227	0.214	0.22	0.221	0.2	0.205	0.211	0.198	0.195	0.183	0.185	0.183	0.184	0.189	0.17	0.182	0.163	0.158	0.142	0.142	0.163	0.135	0.133	0.128	0.128	0.118	0.115	0.088	0.083	0.061
logit(P(Y=1|X)) = (0.25*X+1)^2+1	0.88071	0.083	0.079	0.066	0.075	0.082	0.077	0.073	0.069	0.082	0.072	0.074	0.061	0.077	0.057	0.067	0.07	0.063	0.066	0.073	0.076	0.081	0.062	0.064	0.064	0.063	0.065	0.066	0.066	0.074	0.06	0.061	0.054	0.065	0.056	0.062	0.062	0.048	0.054	0.051	0.039	0.043
logit(P(Y=1|X)) = sin(pi*X+1)+1	0.75693	0.343	0.336	0.325	0.342	0.32	0.347	0.341	0.387	0.358	0.365	0.35	0.318	0.332	0.344	0.338	0.341	0.336	0.324	0.312	0.32	0.309	0.292	0.282	0.293	0.3	0.276	0.263	0.265	0.25	0.221	0.232	0.257	0.223	0.197	0.192	0.195	0.173	0.147	0.14	0.124	0.088
logit(P(Y=1|X)) = sin(2*pi*X+1)+1	0.7117	0.194	0.241	0.225	0.24	0.251	0.262	0.26	0.26	0.276	0.289	0.286	0.285	0.29	0.295	0.289	0.311	0.295	0.28	0.306	0.274	0.289	0.271	0.236	0.266	0.252	0.258	0.235	0.239	0.226	0.225	0.219	0.22	0.196	0.181	0.171	0.176	0.172	0.159	0.128	0.119	0.099
logit(P(Y=1|X)) = sin(3*pi*X+1)+1	0.70879	0.14	0.141	0.151	0.162	0.164	0.158	0.19	0.21	0.202	0.193	0.197	0.212	0.212	0.235	0.207	0.22	0.233	0.235	0.245	0.244	0.225	0.216	0.228	0.225	0.216	0.216	0.187	0.207	0.202	0.193	0.2	0.195	0.194	0.168	0.155	0.152	0.16	0.119	0.115	0.1	0.085
logit(P(Y=1|X)) = cos(pi*X+1)+1	0.74138	0.399	0.385	0.405	0.401	0.416	0.406	0.431	0.399	0.424	0.398	0.409	0.407	0.408	0.396	0.37	0.396	0.379	0.397	0.349	0.354	0.335	0.347	0.352	0.343	0.328	0.301	0.34	0.293	0.282	0.277	0.285	0.246	0.237	0.209	0.209	0.204	0.169	0.176	0.157	0.135	0.092
logit(P(Y=1|X)) = cos(2*pi*X+1)+1	0.71069	0.21	0.212	0.244	0.249	0.246	0.279	0.283	0.274	0.292	0.269	0.293	0.271	0.307	0.315	0.285	0.291	0.297	0.317	0.291	0.277	0.269	0.262	0.29	0.27	0.269	0.269	0.266	0.261	0.25	0.217	0.217	0.223	0.22	0.196	0.184	0.161	0.158	0.142	0.119	0.121	0.096
logit(P(Y=1|X)) = cos(3*pi*X+1)+1	0.70863	0.119	0.161	0.149	0.168	0.136	0.161	0.202	0.194	0.194	0.194	0.225	0.193	0.206	0.206	0.198	0.227	0.215	0.214	0.228	0.224	0.219	0.205	0.202	0.225	0.192	0.213	0.2	0.188	0.203	0.187	0.187	0.203	0.174	0.167	0.153	0.144	0.128	0.157	0.116	0.099	0.093
Simulation power of knnAUC with different ratios in nine simple functions
		maxk=100	maxk=100	maxk=100	maxk=100	maxk=100	maxk=100	maxk=100	maxk=100	maxk=100	maxk=100	maxk=100	maxk=100	maxk=100	maxk=100	maxk=100	maxk=100	maxk=100	maxk=100	maxk=100	maxk=100	maxk=100	maxk=100	maxk=100	maxk=100	maxk=100	maxk=100	maxk=100	maxk=100	maxk=100	maxk=100	maxk=100	maxk=100	maxk=100	maxk=100	maxk=100	maxk=100	maxk=100	maxk=100	maxk=100	maxk=100	maxk=100
N=100, X~N(0,SD^2), SD=1/3	average proportion of Y=1 of 1000 simulations	ratio=0.1	ratio=0.12	ratio=0.14	ratio=0.16	ratio=0.18	ratio=0.2	ratio=0.22	ratio=0.24	ratio=0.26	ratio=0.28	ratio=0.3	ratio=0.32	ratio=0.34	ratio=0.36	ratio=0.38	ratio=0.4	ratio=0.42	ratio=0.44	ratio=0.46	ratio=0.48	ratio=0.5	ratio=0.52	ratio=0.54	ratio=0.56	ratio=0.58	ratio=0.6	ratio=0.62	ratio=0.64	ratio=0.66	ratio=0.68	ratio=0.7	ratio=0.72	ratio=0.74	ratio=0.76	ratio=0.78	ratio=0.8	ratio=0.82	ratio=0.84	ratio=0.86	ratio=0.88	ratio=0.9
logit(P(Y=1|X)) = X+1	0.72505	0.122	0.141	0.117	0.126	0.111	0.124	0.122	0.127	0.135	0.122	0.114	0.11	0.12	0.101	0.106	0.119	0.111	0.11	0.104	0.107	0.112	0.1	0.117	0.094	0.102	0.109	0.105	0.074	0.087	0.087	0.086	0.098	0.074	0.076	0.077	0.083	0.07	0.084	0.06	0.062	0.035
logit(P(Y=1|X)) = (0.25*X+1)^2+1	0.88099	0.072	0.057	0.063	0.069	0.066	0.058	0.066	0.066	0.055	0.063	0.082	0.048	0.058	0.056	0.064	0.059	0.063	0.059	0.07	0.076	0.07	0.059	0.059	0.059	0.069	0.058	0.064	0.065	0.066	0.052	0.063	0.063	0.064	0.061	0.055	0.06	0.055	0.046	0.044	0.033	0.042
logit(P(Y=1|X)) = sin(pi*X+1)+1	0.80185	0.257	0.257	0.242	0.24	0.259	0.245	0.229	0.237	0.243	0.238	0.223	0.228	0.241	0.216	0.208	0.211	0.208	0.21	0.197	0.224	0.21	0.194	0.195	0.2	0.186	0.192	0.178	0.164	0.179	0.153	0.148	0.153	0.155	0.139	0.123	0.13	0.095	0.099	0.103	0.086	0.067
logit(P(Y=1|X)) = sin(2*pi*X+1)+1	0.7272	0.317	0.33	0.341	0.347	0.335	0.331	0.343	0.374	0.365	0.353	0.348	0.363	0.373	0.364	0.344	0.365	0.341	0.333	0.361	0.327	0.34	0.336	0.296	0.333	0.328	0.309	0.27	0.286	0.269	0.26	0.262	0.255	0.236	0.238	0.201	0.202	0.185	0.197	0.15	0.119	0.113
logit(P(Y=1|X)) = sin(3*pi*X+1)+1	0.7117	0.194	0.241	0.225	0.24	0.251	0.262	0.26	0.26	0.276	0.289	0.286	0.285	0.29	0.295	0.289	0.311	0.295	0.28	0.306	0.274	0.289	0.271	0.236	0.266	0.252	0.258	0.235	0.239	0.226	0.225	0.219	0.22	0.196	0.181	0.171	0.176	0.172	0.159	0.128	0.119	0.099
logit(P(Y=1|X)) = cos(pi*X+1)+1	0.77122	0.367	0.365	0.348	0.365	0.366	0.355	0.357	0.365	0.36	0.318	0.352	0.321	0.343	0.319	0.309	0.348	0.327	0.325	0.31	0.298	0.296	0.292	0.284	0.288	0.274	0.263	0.256	0.249	0.242	0.255	0.234	0.205	0.19	0.192	0.177	0.159	0.137	0.144	0.124	0.114	0.086
logit(P(Y=1|X)) = cos(2*pi*X+1)+1	0.72206	0.338	0.311	0.332	0.365	0.342	0.344	0.371	0.379	0.374	0.357	0.353	0.357	0.366	0.338	0.365	0.36	0.365	0.356	0.33	0.323	0.314	0.341	0.345	0.308	0.303	0.313	0.323	0.275	0.279	0.283	0.264	0.251	0.236	0.241	0.214	0.211	0.17	0.157	0.131	0.142	0.097
logit(P(Y=1|X)) = cos(3*pi*X+1)+1	0.71069	0.21	0.212	0.244	0.249	0.246	0.279	0.283	0.274	0.292	0.269	0.293	0.271	0.307	0.315	0.285	0.291	0.297	0.317	0.291	0.277	0.269	0.262	0.29	0.27	0.269	0.269	0.266	0.261	0.25	0.217	0.217	0.223	0.22	0.196	0.184	0.161	0.158	0.142	0.119	0.121	0.096
